# Supplementary material for: Molecular phylogeny and intraspecific differentiation of the Trapelus agilis species complex in Iran (Squamata: Agamidae) inferred from mitochondrial DNA sequences
Source: PeerJ journal article supplement (doi:10.7717/peerj.8295), 2020-02-17

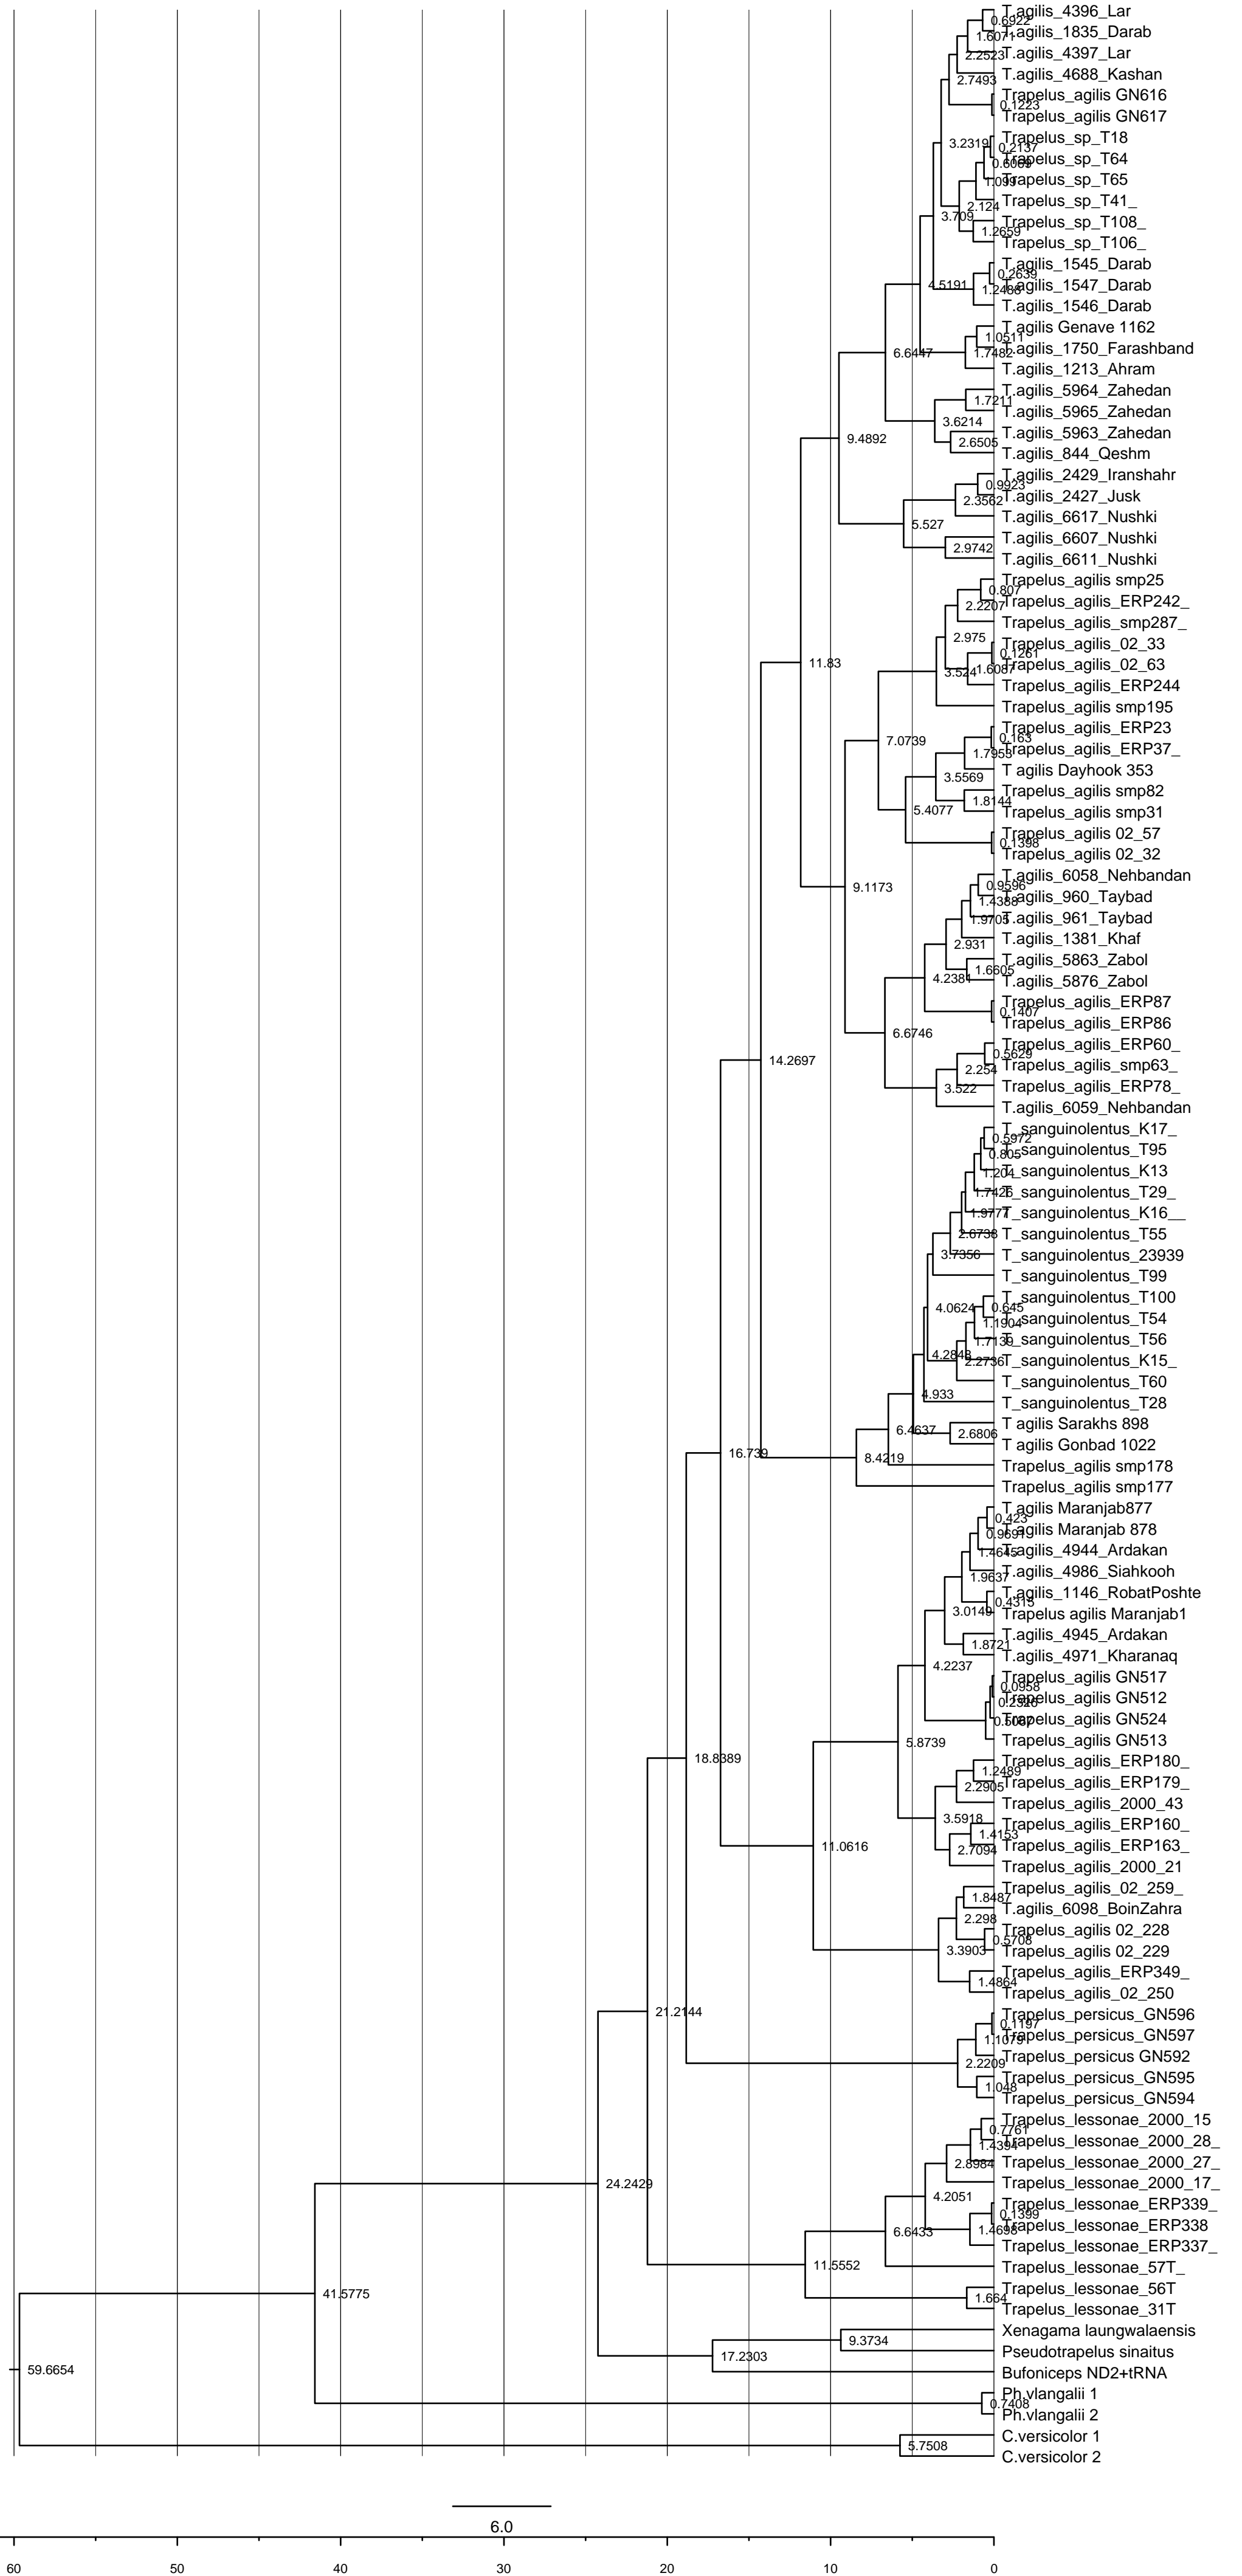

Supplement: figS2.pdf [file figS2.pdf]
